# Supplementary material for: Dynamic Cardiolipin Synthesis Is Required for CD8+ T Cell Immunity
Source: PubMed Central journal article supplement — Cell Metab. 2020 Dec 1;32(6):981–995.e7. doi: 10.1016/j.cmet.2020.11.003 (PMC7721104; doi:10.1016/j.cmet.2020.11.003), 2020-12-01
Supplement: mmc1.pdf [file mmc1.pdf]

## Supplemental Information

### Dynamic Cardiolipin Synthesis

#### Is Required for CD8<sup>+</sup> T Cell Immunity

Mauro Corrado, Joy Edwards-Hicks, Matteo Villa, Lea J. Flachsmann, David E. Sanin, Maaike Jacobs, Francesc Baixauli, Michal Stanczak, Eve Anderson, Mai Azuma, Andrea Quintana, Jonathan D. Curtis, Thomas Clapes, Katarzyna M. Grzes, Agnieszka M. Kabat, Ryan Kyle, Annette E. Patterson, Ramon Klein Geltink, Borko Amulic, Colin G. Steward, Douglas Strathdee, Eirini Trompouki, David O'Sullivan, Edward J. Pearce, and Erika L. Pearce

**Figure S1**

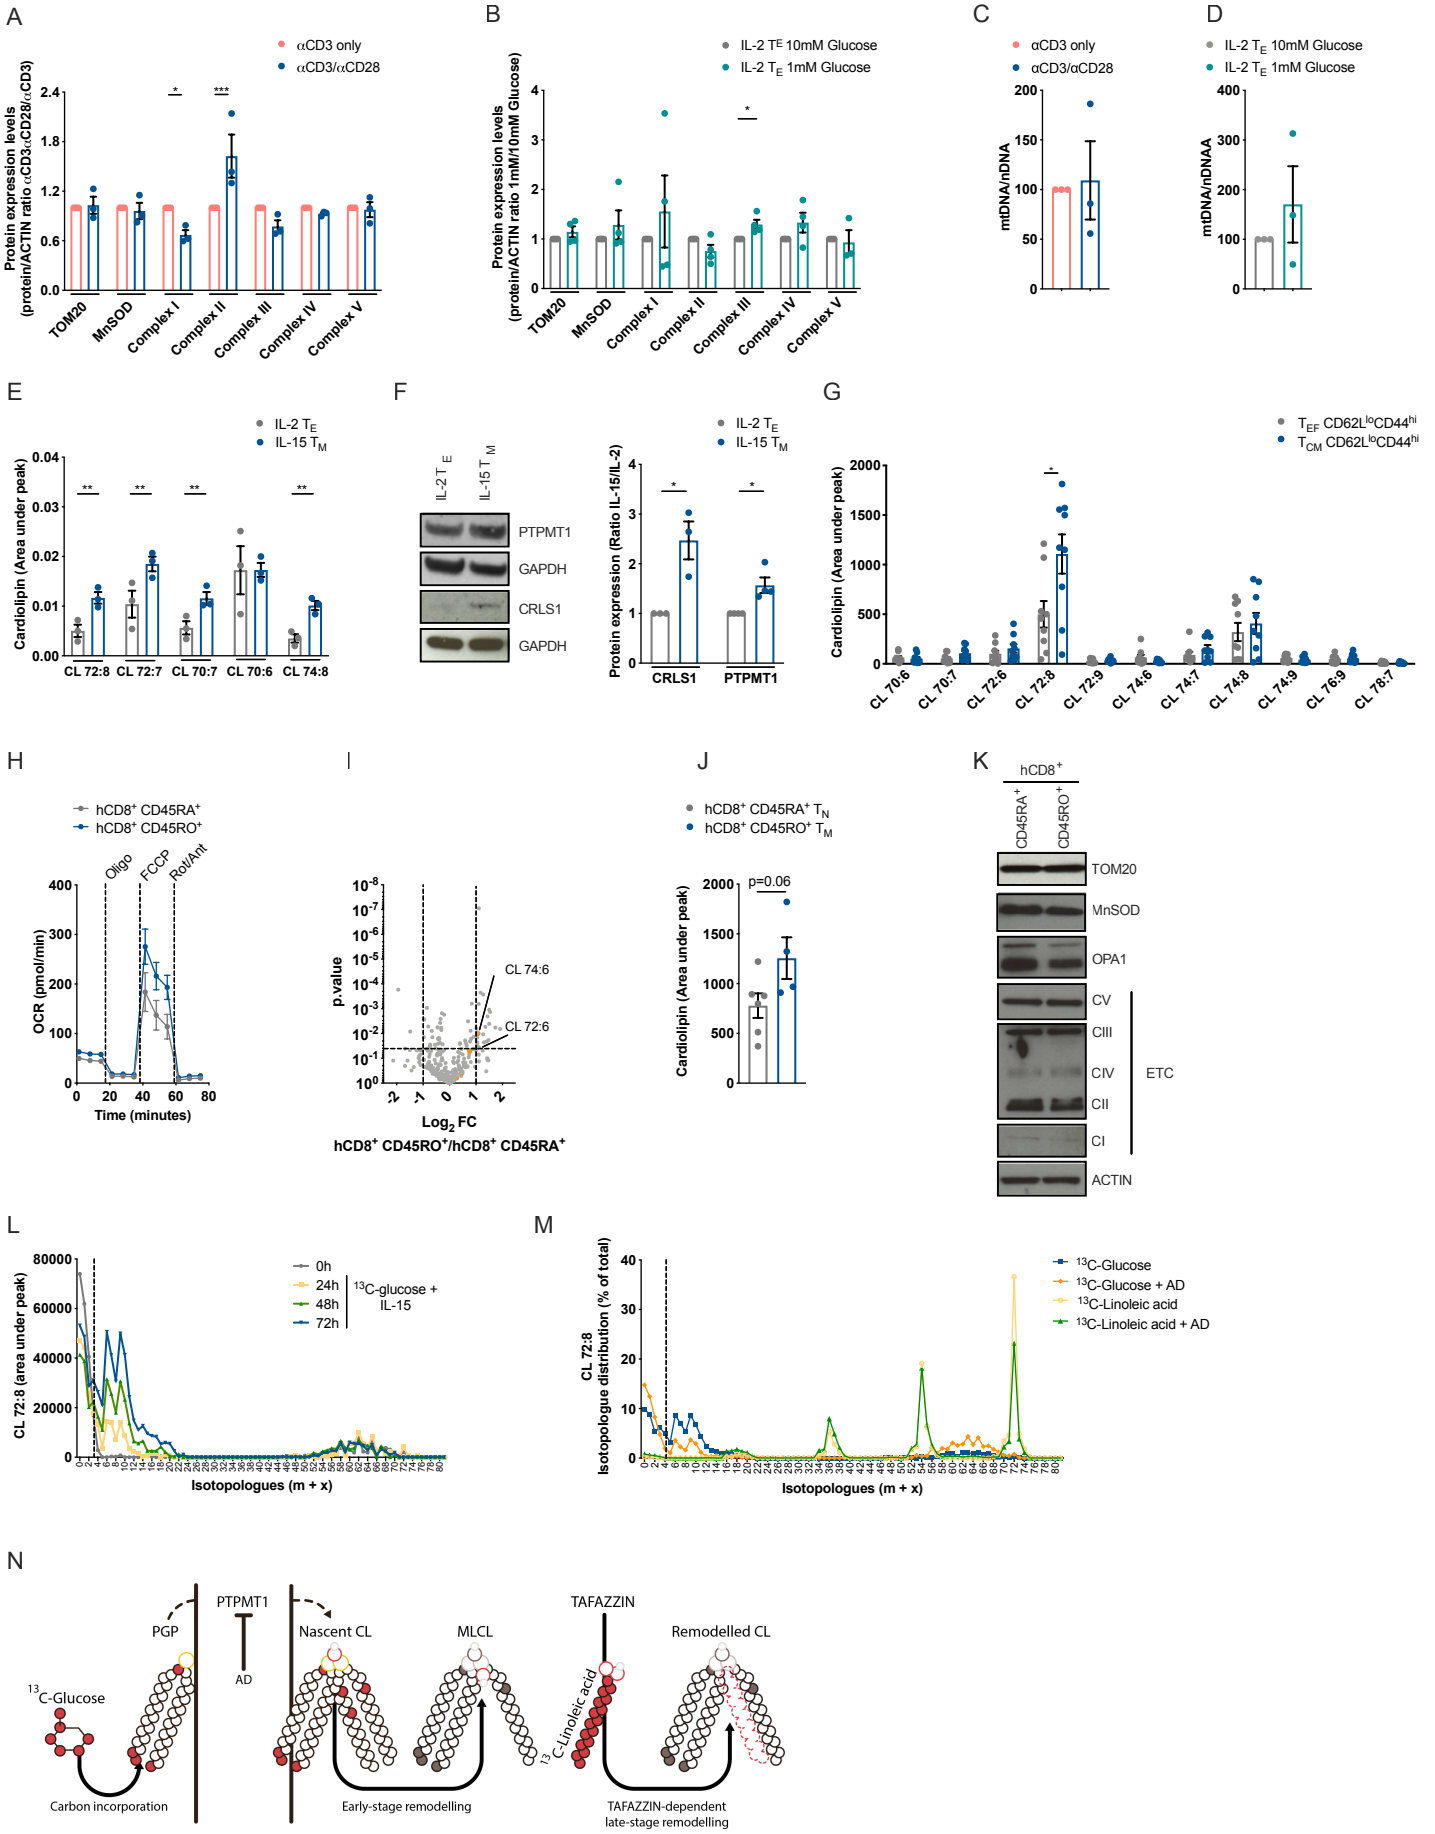

**Figure S1. Mitochondrial protein content and cardiolipin profile in mouse and human CD8<sup>+</sup> T cells with a high OXPHOS demand (Related to Figure 1).**

- (A) Quantification of indicated proteins from immunoblot analysis of CD8<sup>+</sup> T cells activated with  $\alpha$ CD3 only or  $\alpha$ CD3/ $\alpha$ CD28 and differentiated into IL-15 T<sub>M</sub> cells until day 6 post activation. Quantification refers to representative blot in Figure 2D. Data represent mean  $\pm$  SEM of four independent experiments.
  - (B) Quantification of indicated proteins from immunoblot analysis of CD8<sup>+</sup> T cells activated with  $\alpha$ CD3/ $\alpha$ CD28 + IL-2 and cultured in complete medium until day 3, then cultured for 20h in either complete (10mM glucose) or glucose-restricted (1mM glucose) medium for 20h. Quantification refers to representative blot in Figure 2H. Data represent mean  $\pm$  SEM of four independent experiments.
  - (C) mtDNA/nDNA ratio measured as ND1/Hprt Ct ratio in cells treated as in (A). Data represent mean  $\pm$  SEM of three independent experiments.
  - (D) mtDNA/nDNA ratio measured as ND1/Hprt Ct ratio in cells treated as in (B). Data represent mean  $\pm$  SEM of three independent experiments.
  - (E) Cardiolipin species quantification from lipid extracts of CD8<sup>+</sup> T cells activated with  $\alpha$ CD3/ $\alpha$ CD28 and differentiated into IL-2 T<sub>E</sub> and IL-15 T<sub>M</sub> cells, analyzed by LC-MS. Data represent mean  $\pm$  SEM of three independent experiments.
  - (F) Immunoblot analysis and protein quantification of cells activated and differentiated as in Figure 2I. Representative of three independent experiments.
  - (G) Cardiolipin species quantification from lipids extracts of T<sub>E</sub> (CD62L<sup>lo</sup>CD44<sup>hi</sup>) and T<sub>M</sub> (CD62L<sup>hi</sup>CD44<sup>hi</sup>) Wt CD8<sup>+</sup> T cells from 20-month old mice. Scatter dot plots with mean  $\pm$  SEM bars. Dots represent individual mice (n=8-9/group).
  - (H) OCR of freshly isolated human CD8<sup>+</sup> CD45RA<sup>+</sup> and CD8<sup>+</sup> CD45RO<sup>+</sup> T cells at baseline and after exposure to Oligomycin (Oligo), FCCP and Rotenone/Antimycin (Rot/Ant). Data representative of three independent experiments (n=4-5/group)
  - (I) Lipids extracted from freshly isolated human CD8<sup>+</sup> CD45RA<sup>+</sup> and CD8<sup>+</sup> CD45RO<sup>+</sup> T cells and analyzed by LC-MS. Log2FC and p value calculated with Anova test from 4-6 samples per group.
  - (J) Total cardiolipin content from freshly isolated human CD8<sup>+</sup> CD45RA<sup>+</sup> and CD8<sup>+</sup> CD45RO<sup>+</sup> T cells analyzed by LC-MS. Scatter dot plots with mean  $\pm$  SEM bars. Each dot represents individual donor (n=4-6/group).
  - (K) Representative immunoblot analysis of cell extracts from freshly isolated human CD8<sup>+</sup> CD45RA<sup>+</sup> and CD8<sup>+</sup> CD45RO<sup>+</sup> T cells probed with indicated antibodies.
  - (L) Isotopologue distribution of <sup>13</sup>C-glucose derived carbons incorporated into CL 72:8 in mouse CD8<sup>+</sup> T cells differentiated into IL-15 T<sub>M</sub> cells in presence of <sup>13</sup>C-glucose. At indicated time points lipids were extracted and glucose derived carbons traced into CL 72:8.
  - (M) Normalized % Isotopologue distribution of <sup>13</sup>C-glucose- and <sup>13</sup>C-linoleic acid-derived carbons incorporated into CL 72:8 in mouse CD8<sup>+</sup> T cells differentiated in IL-15 T<sub>M</sub> cells for 72h in presence of <sup>13</sup>C-glucose or <sup>13</sup>C-palmitate  $\pm$  cardiolipin synthesis inhibitor (AD) during IL-15 differentiation.
  - (N) Schematic of glucose- and palmitate/linoleic acid-derived carbons incorporated into cardiolipin.
- Statistical comparisons for two groups were calculated by unpaired two-tailed Student's t test or Anova test, where indicated, \*p < 0.05; \*\*p < 0.01; \*\*\*p < 0.001.

**Figure S2**

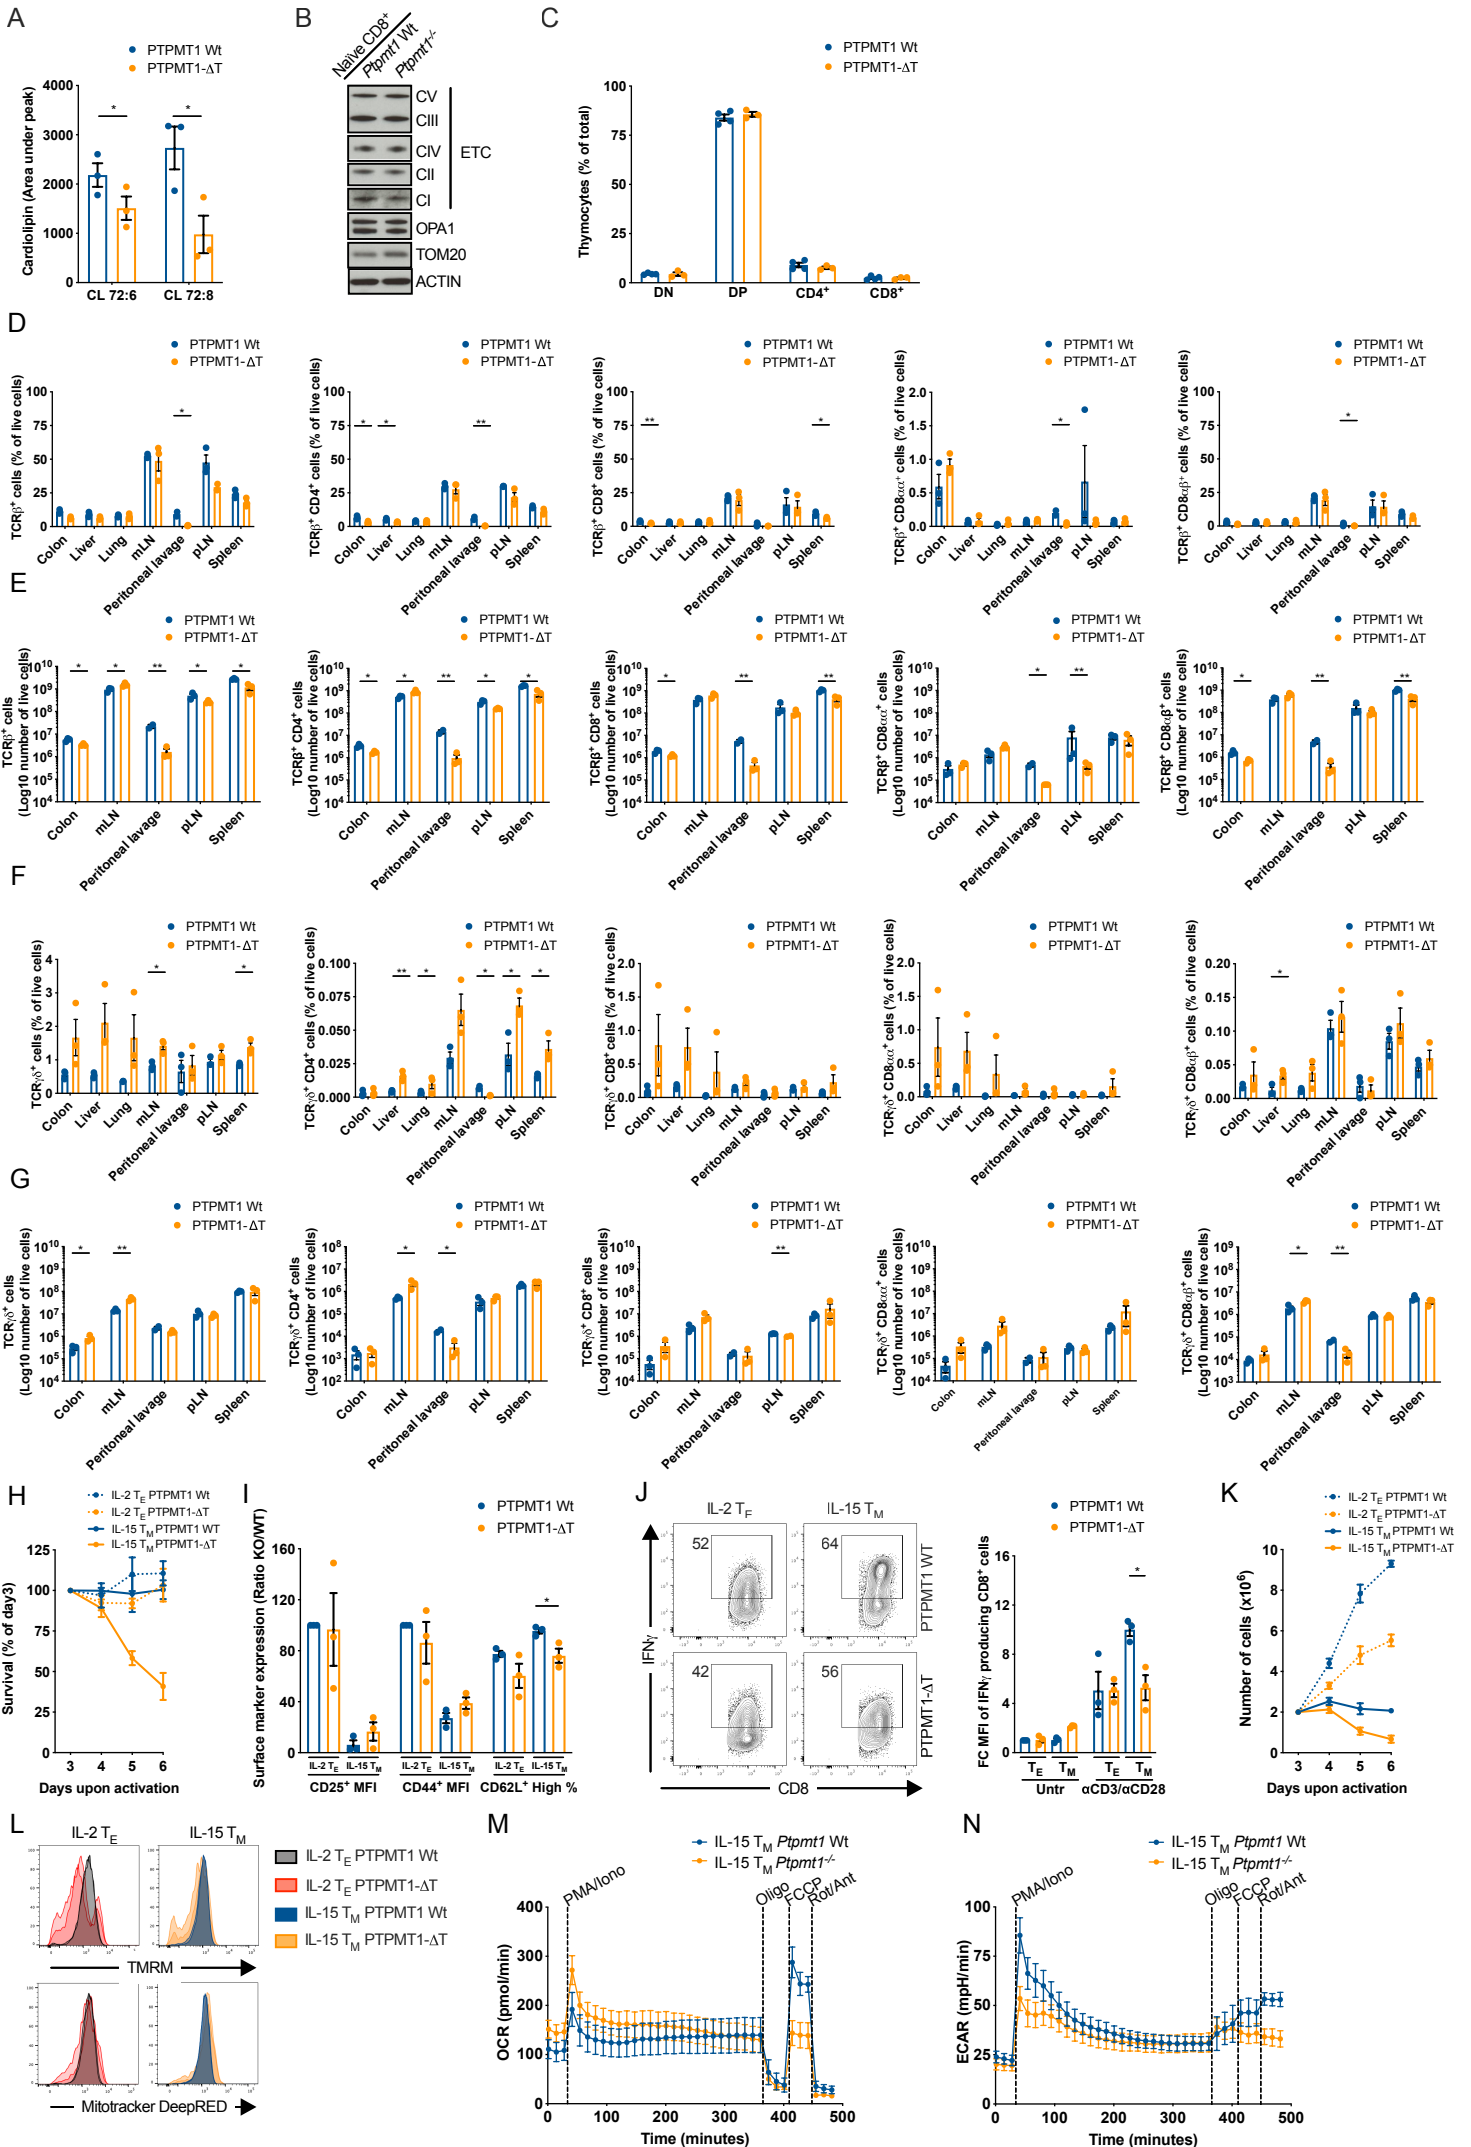

**Figure S2. Analysis of WT and *Ptpmt1*-ΔT mice, and T cells isolated from these mice (Related to Figure 2).**

- (A) Amount of cardiolipin 72:6 and 72:8 from Wt and *Ptpmt1*-ΔT CD8<sup>+</sup> T cells analyzed by LC-MS shown as mean ± SEM. Representative of three experiments (N=3/group).
- (B) Immunoblot analysis of cell extracts from naïve WT and *Ptpmt1*-ΔT CD8<sup>+</sup> T cells. Representative of two experiments.
- (C) Thymocyte development analyzed by CD4/CD8/CD25/CD44 surface expression in 8- week old Wt and PTPMT1-ΔT mice shown as mean ± SEM bars. Dots represent individual mice (n=3-4/group).
- (D) % frequencies of TCRβ, TCRβ CD4<sup>+</sup>, TCRβ CD8<sup>+</sup>, TCRβ CD8αα<sup>+</sup>, TCRβ CD8αβ<sup>+</sup> T cells in colon, liver, lung, mesenteric lymph nodes (mLN), peritoneal lavage, peripheral lymph node (pLN) and spleens of Wt and PTPMT1-ΔT mice. Data are shown as mean ± SEM bars. Dots represent individual mice (n=3/group).
- (E) Cell number expressed in Log10 scale of TCRβ, TCRβ CD4<sup>+</sup>, TCRβ CD8<sup>+</sup>, TCRβ CD8αα<sup>+</sup>, TCRβ CD8αβ<sup>+</sup> T cells in colon, mesenteric lymph nodes (mLN), peritoneal lavage, peripheral lymph node (pLN) and spleens of Wt and PTPMT1-ΔT mice. Data are shown as mean ± SEM bars. Dots represent individual mice (n=3/group).
- (F) % frequencies of TCRγδ, TCRγδ CD4<sup>+</sup>, TCRγδ CD8<sup>+</sup>, TCRγδ CD8αα<sup>+</sup>, TCRγδ CD8αβ<sup>+</sup> T cells in colon, liver, lung, mesenteric lymph nodes (mLN), peritoneal lavage, peripheral lymph node (pLN) and spleens of Wt and PTPMT1-ΔT mice. Data are shown as mean ± SEM bars. Dots represent individual mice (n=3/group).
- (G) Cell number expressed in Log10 scale of TCRγδ, TCRγδ CD4<sup>+</sup>, TCRγδ CD8<sup>+</sup>, TCRγδ CD8αα<sup>+</sup>, TCRγδ CD8αβ<sup>+</sup> T cells in colon, mesenteric lymph nodes (mLN), peritoneal lavage, peripheral lymph node (pLN) and spleens of Wt and PTPMT1-ΔT mice. Data are shown as mean ± SEM bars. Dots represent individual mice (n=3/group).
- (H) Relative survival of WT and *Ptpmt1*<sup>-/-</sup> CD8<sup>+</sup> T cells differentiated in IL-2 (T<sub>E</sub> cells) or IL-15 (T<sub>M</sub> cells) starting at day 3 post activation. Analyzed by 7-AAD exclusion by flow cytometry. Data represent mean ± SEM of three independent experiment (n=3/group).
- (I) CD25, CD44, CD62L expression in Wt and *Ptpmt1*<sup>-/-</sup> CD8<sup>+</sup> T cells cultured for 72h in IL-2 T<sub>E</sub> and IL-15 T<sub>M</sub> cell conditions. Data represent mean ± SEM of three independent experiments (n=3/group).
- (J) Flow cytometry analysis of IFNγ production in IL-2 T<sub>E</sub> and IL-15 T<sub>M</sub> Wt and *Ptpmt1*<sup>-/-</sup> CD8<sup>+</sup> T cells stimulated for 20h with αCD3/αCD28 antibodies. Graph shows fold change of IFNγ MFI of cytokine producing cells. Data represent mean ± SEM of three independent experiments (n=3/group).
- (K) Cell proliferation of mouse Wt and *Ptpmt1*<sup>-/-</sup> CD8<sup>+</sup> T cells measured as cell number between day 3 and day 6 of IL-2 or IL-15 culture, shown as mean ± SEM of 3 independent experiments (n=3/group).
- (L) Mitochondrial membrane potential measured with TMRM (upper panel) and mitochondrial mass measured as MitotrackerDeep Red incorporation (lower panel) in IL-2 T<sub>E</sub> and IL-15 T<sub>M</sub> Wt and *Ptpmt1*<sup>-/-</sup> CD8<sup>+</sup> T cells analyzed by flow cytometry. Representative of 4 Wt and 4 PTPMT1-ΔT mice.
- (M) OCR of IL-15 T<sub>M</sub> Wt and *Ptpmt1*<sup>-/-</sup> CD8<sup>+</sup> T cells stimulated with PMA/Iono during a Seahorse experiment. Representative of two independent experiment (n=3/group).
- (N) Glycolysis measured as extracellular acidification rate (ECAR) in IL-15 T<sub>M</sub> Wt and *Ptpmt1*<sup>-/-</sup> CD8<sup>+</sup> T cells stimulated with PMA/Iono during a Seahorse experiment. Representative of two independent experiment (n=3/group).
- Statistical comparisons for two groups were calculated by unpaired two-tailed Student's t test, \*p < 0.05; \*\*p < 0.01; \*\*\*p < 0.001.

**Figure S3**

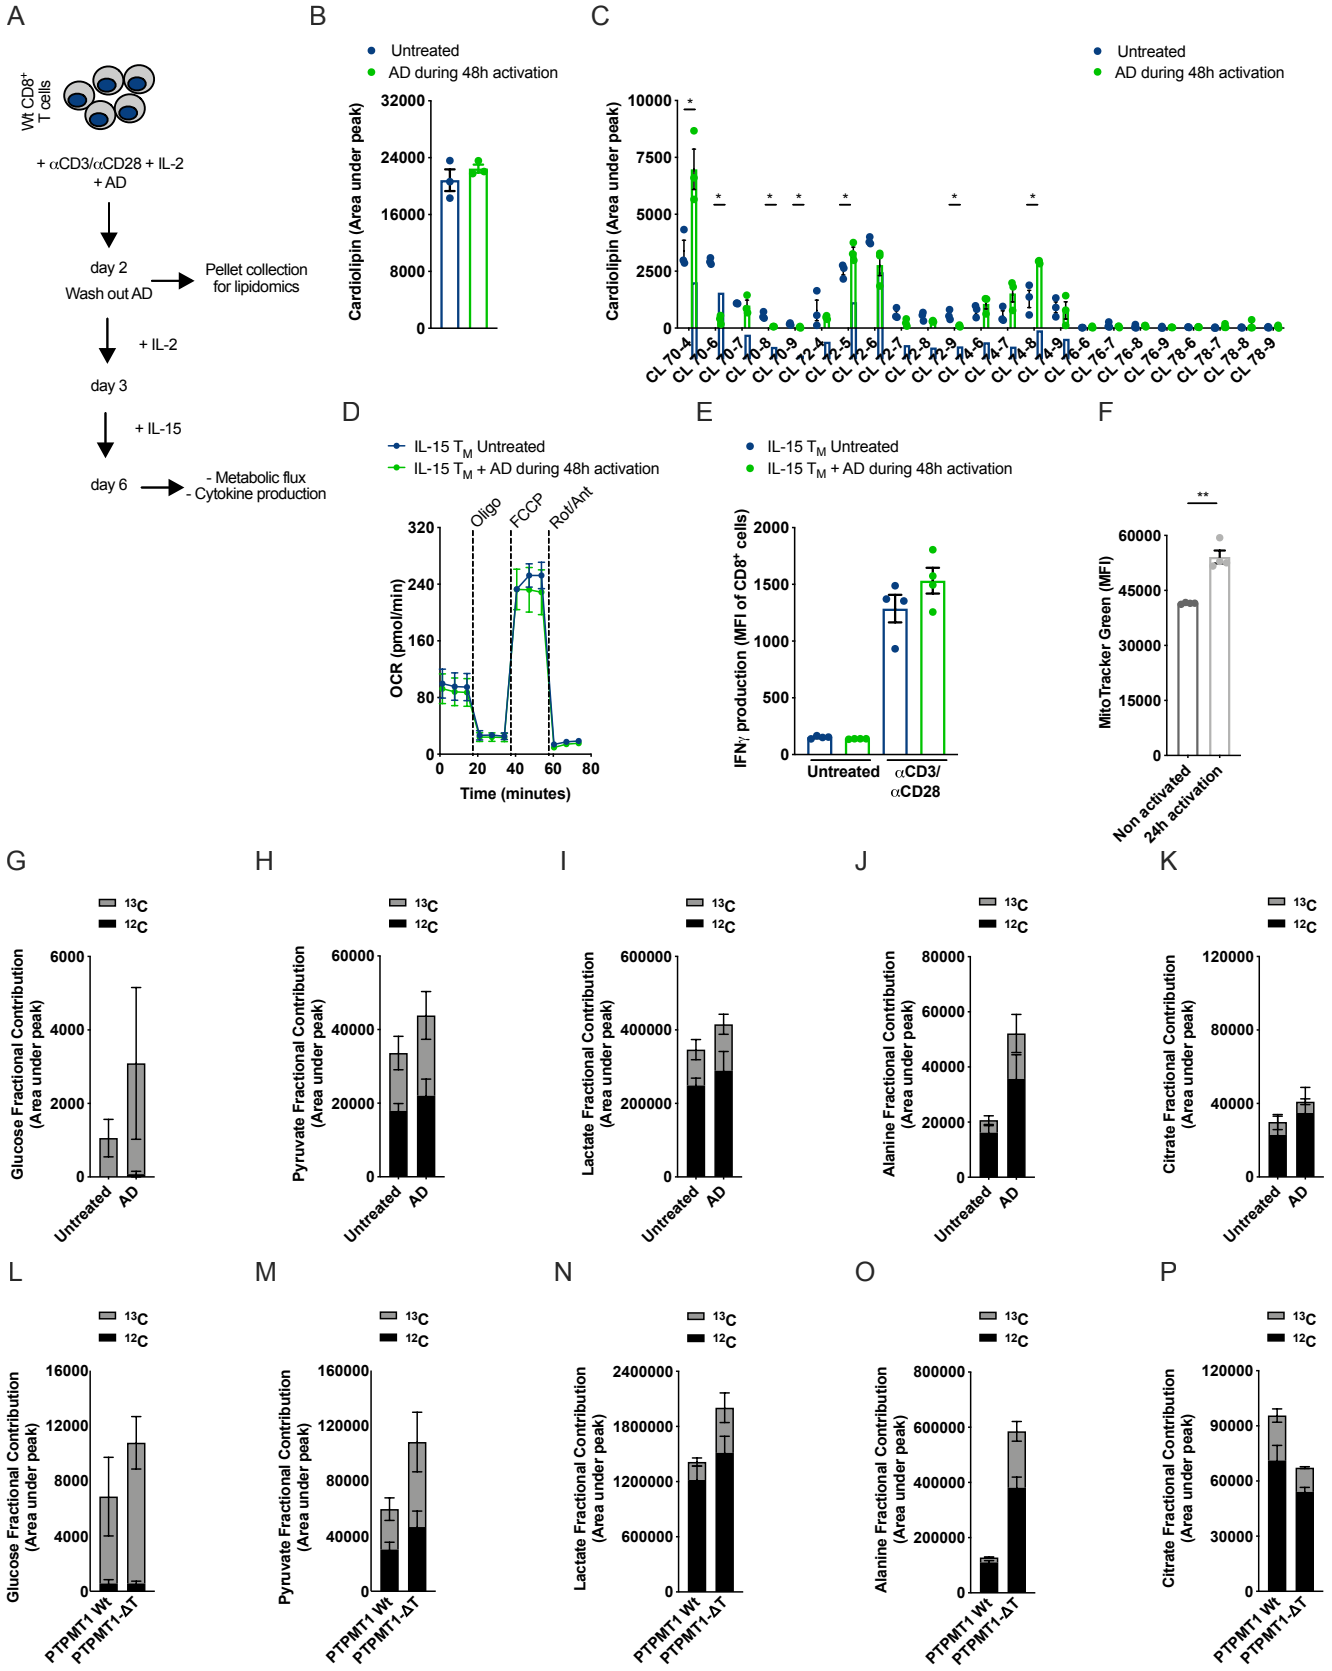

**Figure S3. <sup>13</sup>C-glucose tracing analysis in Wt and *Ptpmt1*<sup>-/-</sup> CD8<sup>+</sup> T cells upon activation (Related to Figure 3).**

- (A) Schematic of CD8<sup>+</sup> T cells activated with  $\alpha$ CD3/ $\alpha$ CD28 + IL-2  $\pm$  AD for 48h. After 48h AD was washed out and, starting 24h later, cells were differentiated into IL-15 T<sub>M</sub> cells.
  - (B) Total cardiolipin amount CD8<sup>+</sup> T cells activated and treated as in (A) analyzed by LC-MS. Scatter dot plot represents mean  $\pm$  SEM (n=3/group).
  - (C) Cardiolipin species quantification from lipid extracts of CD8<sup>+</sup> T cells activated and treated as in (A) analyzed by LC-MS. Scatter dot plot represents mean  $\pm$  SEM (n=3/group).
  - (D) OCR of CD8<sup>+</sup> T cells cultured  $\pm$  AD for 48h during activation activated with  $\alpha$ CD3/ $\alpha$ CD28 + IL-2 before washing out the inhibitor and differentiating the cells into IL-15 T<sub>M</sub> cells. On day 6 post activation the Seahorse experiment was performed. Data represents mean  $\pm$  SEM of three independent experiments.
  - (E) IFN $\gamma$  production measured in IL-15 T<sub>M</sub> cells activated and cultured as in (A) and stimulated for 20h with  $\alpha$ CD3/ $\alpha$ CD28 + IL-2 analyzed by flow cytometry. Data represent mean  $\pm$  SEM of three independent experiments (n=4/group).
  - (F) Mitotracker green staining in Wt CD8<sup>+</sup> cells activated  $\alpha$ CD3/ $\alpha$ CD28 + IL-2 for 24h. Data are representative of three independent experiments (n=3/group).
  - (G-K) Fractional contribution of <sup>13</sup>C-glucose derived carbons to total amount of indicated metabolites in Wt CD8<sup>+</sup> T treated with or without AD as described in Figure 3H.
  - (L-P) Fractional contribution of <sup>13</sup>C-glucose derived carbons to total amount of indicated metabolites in Wt and *Ptpmt1*<sup>-/-</sup> CD8<sup>+</sup> T cells treated as described in Figure 3J.
- Statistical comparisons for two groups were calculated by unpaired two-tailed Student's t test, \*p < 0.05; \*\*p < 0.01; \*\*\*p < 0.001.

**Figure S4**

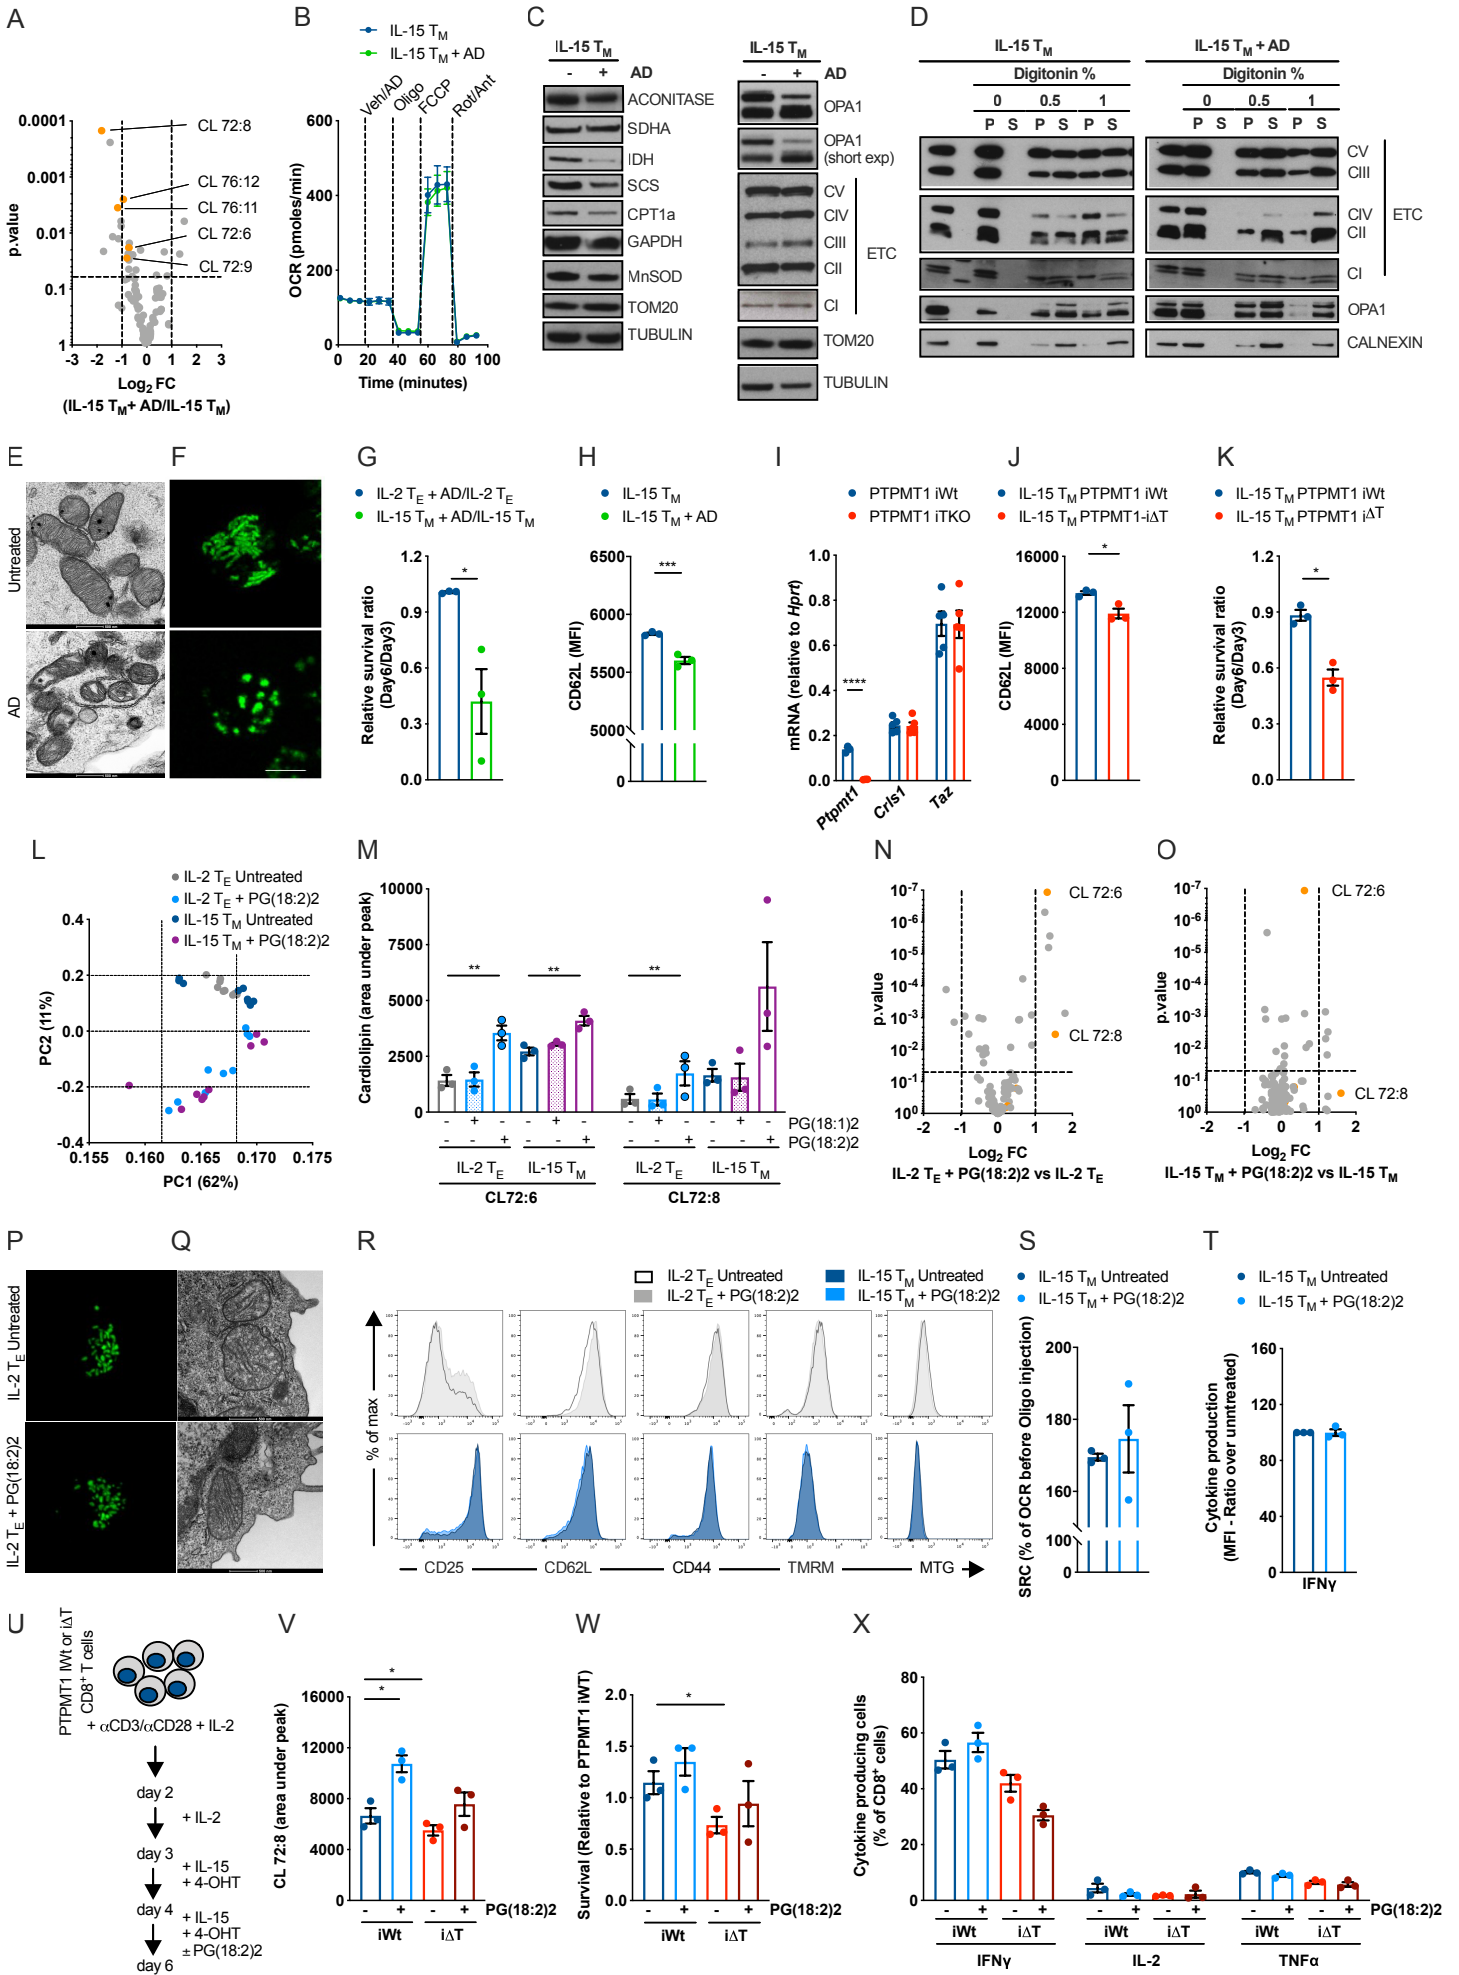



**Figure S4. Cardiolipin profile, mitochondrial protein levels, morphology, and ultrastructure in CD8<sup>+</sup> T cells after AD and PG(18:2) treatment (Related to Figure 4).**

- (A) Lipids extracted from IL-15 T<sub>M</sub> CD8<sup>+</sup> T cells cultured as in Figure 3A and analyzed by LC-MS. Log<sub>2</sub>FC and p value calculated with Anova test from 3 samples per group.
- (B) OCR of IL-15 T<sub>M</sub> CD8<sup>+</sup> T cells at baseline and after exposure to Vehicle/AD, Oligomycin (Oligo), FCCP, and Rotenone/Antimycin (Rot/Ant). Data representative of three independent experiments (n=3/group).
- (C) Immunoblot analysis of Wt IL-15 T<sub>M</sub> CD8<sup>+</sup> T cells cultured ± AD for 72h.
- (D) Immunoblot analysis of CALNEXIN, OPA1 and ETC complexes (CI-NDUFB8, CII-SDHB, CIII-UQCRC2, CIV-MTC01, CV-ATP5A). Equivalent numbers of IL-15 T<sub>M</sub> cells cultured ± AD for 72h were lysed in native lysis buffer followed by digitonin solubilization of intracellular membranes with pellet (P) and solubilized supernatant (S) fractions resolved on a denaturing gel, representative of two experiments.
- (E) Representative electron micrographs of mouse IL-15 T<sub>M</sub> CD8<sup>+</sup> T cells cultured ± AD for 72h. Scale bars: 500nm.
- (F) Representative mitochondrial morphology of live IL-15 T<sub>M</sub> CD8<sup>+</sup> T cells isolated from PhAM mice cultured ± AD for 72h analyzed by spinning disk confocal microscopy. Scale bar: 5µm
- (G) Relative survival ratio of IL-2 T<sub>E</sub> and IL-15 T<sub>M</sub> cells cultured ± AD for 72h starting at day 3 post activation analyzed by 7-AAD exclusion by flow cytometry. Data represent mean ± SEM of three independent experiments (n=3/group).
- (H) CD62L expression in mouse IL-15 T<sub>M</sub> cells cultured in ± AD for 72h analyzed by flow cytometry. Data represent mean ± SEM of three independent experiments (n=3/group).
- (I) CD8<sup>+</sup> T cells were isolated from *Ptpmt1<sup>fllox/fllox</sup>Ert2-Cre<sup>-/-</sup>* (PTPMT1 iWt) *Ptpmt1<sup>fllox/fllox</sup>Ert2-Cre<sup>+/-</sup>* (PTPMT1 iΔT) mice. Efficiency of *Ptpmt1* deletion by Cre recombinase, *Crls1* and *Taz* expression levels measured after iWt and iΔT cells were cultured in IL-15 in presence of 4-OHT for 72h analyzed by qPCR shown as mean ± SEM (n=3/group).
- (J) CD62L expression in mouse *Ptpmt1* iWt and *Ptpmt1* iΔT CD8<sup>+</sup> T cells cultured as in Figure 3E analyzed by flow cytometry. Data represent mean ± SEM of three independent experiments (n=3/group).
- (K) Relative survival of IL-15 T<sub>M</sub> PTPMT1 iΔT versus IL-15 T<sub>M</sub> PTPMT1 iWt T cells cultured with 4-OHT for 72h starting at day 3 post activation and analyzed by 7-AAD exclusion by flow cytometry. Data represent mean ± SEM of three independent experiments (n=3/group).
- (L) PCA analysis of lipids extracted from CD8<sup>+</sup> T cells differentiated into IL-2 T<sub>E</sub> and IL-15 T<sub>M</sub> cells ± PG(18:2)2 and analyzed by LC-MS.
- (M) Cardiolipin species quantification from lipids extracts from IL-15 T<sub>M</sub> CD8<sup>+</sup> T cells cultured as in (N) analyzed by LC-MS. Data represent mean ± SEM of three independent experiments.
- (N-O) Lipids extracted from CD8<sup>+</sup> T cells differentiated into IL-2 T<sub>E</sub> or IL-15 T<sub>M</sub> cells ± PG(18:2)2 and analyzed by LC-MS. Log<sub>2</sub>FC and p value calculated with Anova test from 9 samples per group.
- (P-Q) Representative mitochondrial morphology of live CD8<sup>+</sup> T cells cultured in IL-2 in the presence of BSA-conjugated 50µM PG(18:2)2 for 48h. Scale bars: 5µm confocal, 500nm EM.
- (R) Representative histogram plots depicting surface expression of CD25, CD62L, CD44 together with TMRM and Mitotracker green staining in mouse IL-2 T<sub>E</sub> and IL-15 T<sub>M</sub> CD8<sup>+</sup> T cells untreated or cultured in the presence of BSA-conjugated 50µM PG(18:2)2 for 48h.
- (S) SRC of mouse IL-15 T<sub>M</sub> CD8<sup>+</sup> T cells cultured ± PG(18:2)2 for 48h stimulated with αCD3/αCD28 coated beads in a Seahorse Extracellular Flux Analyzer. Data represent mean ± SEM of three independent experiments (n=3/group).
- (T) Cytokine production (normalized to untreated cells) measured in IL-15 T<sub>M</sub> CD8<sup>+</sup> T cells activated as in (I) and stimulated for 20h with αCD3/αCD28 + IL-2. Data represent mean ± SEM of two or three independent experiment (n=3/group).
- (U) Schematic of mouse *Ptpmt1* iWt and *Ptpmt1* iΔT CD8<sup>+</sup> T cells activated with αCD3/αCD28 + IL-2 for 24, cultured in IL-2 for additional 24h. 4-OHT was supplemented starting from day3 post activation together with IL-15. From day4 to day 6 post activation cells were cultured in the presence of BSA-conjugated 50µM PG(18:2)2 for 48h.
- (V) Quantification of CL 72:8 content in IL-15 T<sub>M</sub> cells cultured as in (U) and analyzed by LC-MS. Scatter dot plots with mean ± SEM of three independent experiments (n=3/group).
- (W) Relative survival of IL-15 T<sub>M</sub> PTPMT1 iΔT versus IL-15 T<sub>M</sub> PTPMT1 iWt T cells cultured as in (U) and analyzed by 7-AAD exclusion by flow cytometry. Data represent mean ± SEM of three independent experiments (n=3/group).
- (X) Cytokine production measured in IL-15 T<sub>M</sub> CD8<sup>+</sup> T cells cultured as in (U) and stimulated for 20h with αCD3/αCD28 + IL-2. Data represent mean ± SEM of three independent experiment (n=3/group).  
Statistical comparisons for two groups were calculated by unpaired two-tailed Student's t test or Anova test, where indicated, \*p < 0.05; \*\*p < 0.01; \*\*\*p < 0.001.

**Figure S5**

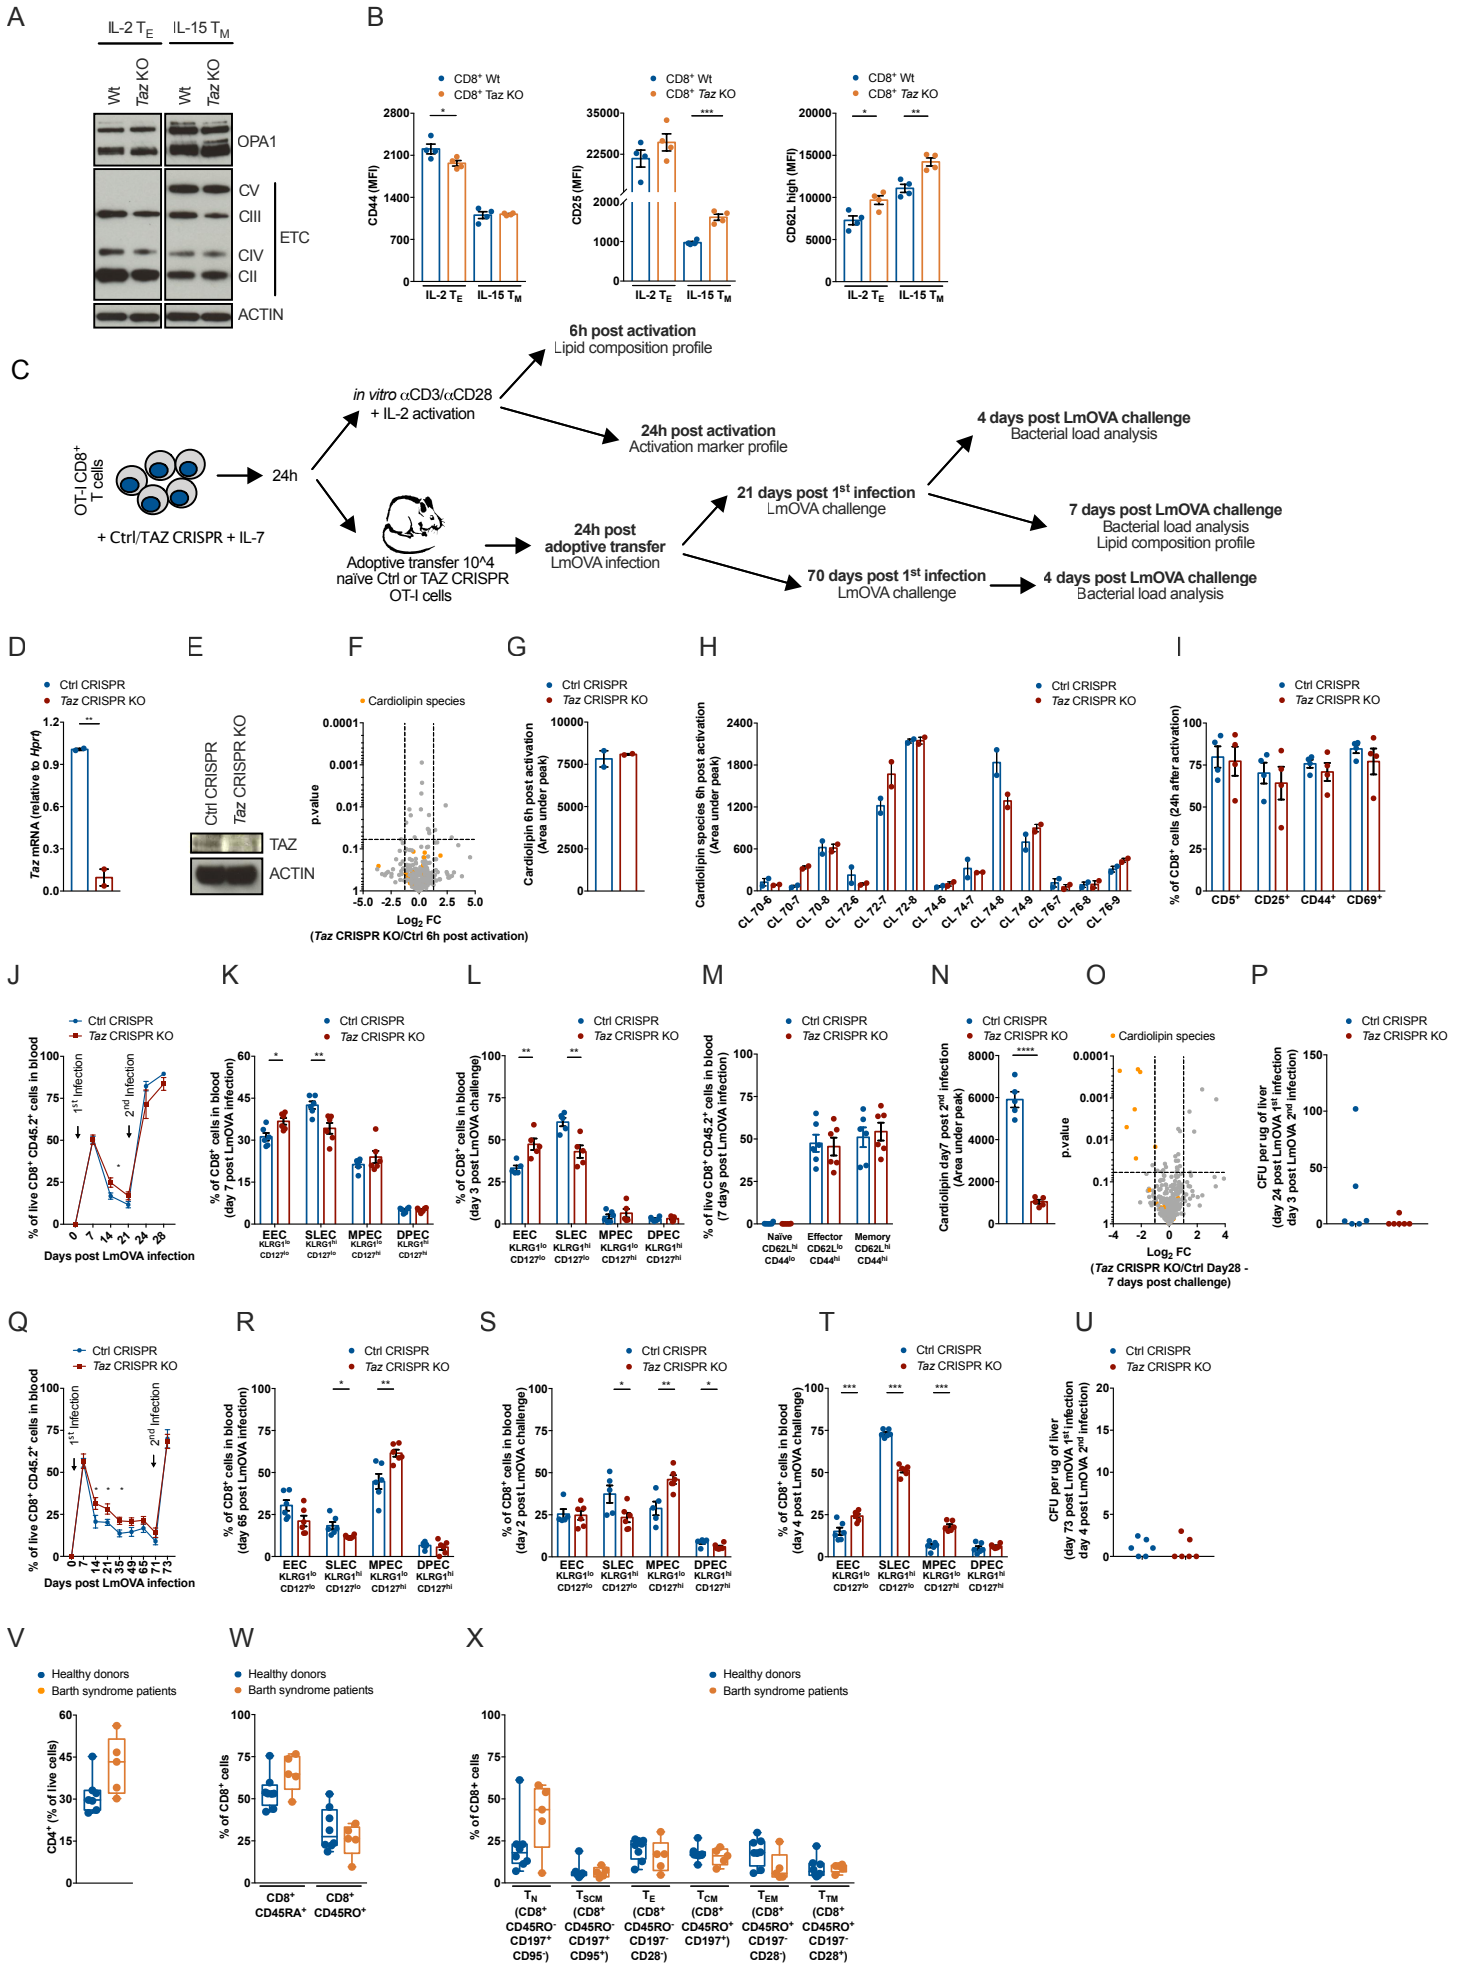

**Figure S5. T cell defects in TAK KO mice are not T cell intrinsic (Related to Figure 5).**

- (A) Immunoblot analysis of cell extracts of CD8<sup>+</sup> T cells from 20-week old Wt and *Tafazzin* KO mice activated with  $\alpha$ CD3/ $\alpha$ CD28 + IL-2 and differentiated into IL-2 T<sub>E</sub> or IL-15 T<sub>M</sub> cells for 72h starting day 3 post activation.
- (B) CD44, CD25, CD62L expression in CD8<sup>+</sup> T cells from 20 week old Wt and *Tafazzin* KO mice activated with  $\alpha$ CD3/ $\alpha$ CD28 + IL-2 and differentiated in IL-2 T<sub>E</sub> or IL-15 T<sub>M</sub> cells for 72h starting day 3 post activation analyzed by flow cytometry. Data representative of 3 independent experiments shown as mean  $\pm$  SEM (n=4/group).
- (C) Schematic of experimental setup. Naïve OT-I cells were ctrl (Ctrl CRISPR) or *Tafazzin* (*Taz* CRISPR KO) CRISPRed, followed by 24 a rest period in IL-7. After 24h cells were either *in vitro* activated and lipids and activation markers analyzed at indicated time points, or adoptively transferred *in vivo* into congenic mice, which were then infected 24h later i.v. with 1x10<sup>6</sup> CFU LmOVA  $\Delta$ Acta and followed as indicated. After 21 days (or 70 days), mice were challenged i.v. with LmOVA Wt or  $\Delta$ Acta, Donor cells frequencies and bacterial analyzed post challenge as indicated.
- (D) *Tafazzin* expression in OT-I cells 24h after CRISPR, analyzed by qPCR shown as mean  $\pm$  SEM (n=2/group).
- (E) *Tafazzin* expression in OT-I cells 24h after CRISPR, analyzed by Wb.
- (F) Lipids extracted from Ctrl CRISPR and *Taz* CRISPR KO OT-I cells 6h after activation with  $\alpha$ CD3/ $\alpha$ CD28 + IL-2, analyzed by LC-MS. Data show Log<sub>2</sub>FC and p value calculated with Anova test from two samples per condition per time point.
- (G) Total cardiolipin amount in Ctrl CRISPR and *Taz* CRISPR KO OT-I cells 6h after activation with  $\alpha$ CD3/ $\alpha$ CD28 + IL-2 analyzed by LC-MS. Data show mean  $\pm$  SEM and p value calculated with Anova test from two samples per condition per time point.
- (H) Cardiolipin species quantification from lipid extracts of Ctrl CRISPR and *Taz* CRISPR KO OT-I cells 6h after activation with  $\alpha$ CD3/ $\alpha$ CD28 + IL-2 analyzed by LC-MS. Scatter dot plots with mean  $\pm$  SEM bars (n=2/group).
- (I) CD5, CD44, CD25, CD69 expression in Ctrl CRISPR and *Taz* CRISPR KO OT-I cells 24h after activation with  $\alpha$ CD3/ $\alpha$ CD28 + IL-2, analyzed by flow cytometry. Data from 4 independent CRISPR experiments shown as mean  $\pm$  SEM.
- (J) % of Ctrl CRISPR and *Taz* CRISPR KO OT-I CD8<sup>+</sup> CD45.2<sup>+</sup> donor cells in congenic mice infected i.v. with 10<sup>6</sup> CFU LmOVA  $\Delta$ Acta shown as mean  $\pm$  SEM. Representative of two experiments (n=6/group).
- (K) EEC, SLEC, MPEC and DPEC Ctrl CRISPR and *Taz* CRISPR KO OT-I CD8<sup>+</sup> CD45.2<sup>+</sup> donor cells 7 days after primary infection analyzed according to KLRG1 and CD127 surface expression shown as mean  $\pm$  SEM bars. Representative of two independent experiments (n=6/group).
- (L) EEC, SLEC, MPEC and DPEC Ctrl CRISPR and *Taz* CRISPR KO OT-I CD8<sup>+</sup> CD45.2<sup>+</sup> donor cells 3 days after secondary infection analyzed according to KLRG1 and CD127 surface expression shown as mean  $\pm$  SEM bars. Representative of two independent experiments (n=6/group).
- (M) % of naïve (CD62L<sup>hi</sup>CD44<sup>lo</sup>), T<sub>E</sub> (CD62L<sup>lo</sup>CD44<sup>hi</sup>) and T<sub>M</sub> (CD62L<sup>hi</sup>CD44<sup>hi</sup>) CD8<sup>+</sup> CD45.2<sup>+</sup> donor Ctrl CRISPR and *Taz* CRISPR KO OT-I cells 7 days after primary infection analyzed by flow cytometry shown as mean  $\pm$  SEM bars. Scatter dot plot represents mean  $\pm$  SEM. Dots represent individual mice (n=6/group).
- (N) Total cardiolipin amount in Ctrl CRISPR and *Taz* CRISPR KO OT-I cells 7 days after secondary infection analyzed by LC-MS. Scatter dot plots with mean  $\pm$  SEM bars (n=5/group).
- (O) Lipids extracted from Ctrl CRISPR and *Taz* CRISPR KO OT-I cells sorted from recipient mice 7 days after LmOVA  $\Delta$ Acta challenge. Data show Log<sub>2</sub>FC and p value calculated with Anova test from 6 samples per group.
- (P) Bacterial burden shown as CFU per  $\mu$ g of liver isolated from mice adoptively transferred with Ctrl CRISPR and *Taz* CRISPR KO OT-I cells 3 days post LmOVA challenge. Each dot represents individual mice (n=6/group).
- (Q) % of Ctrl CRISPR and *Taz* CRISPR KO OT-I CD8<sup>+</sup> CD45.2<sup>+</sup> donor cells in congenic mice infected i.v. with 10<sup>6</sup> CFU LmOVA  $\Delta$ Acta shown as mean  $\pm$  SEM (n=6/group).
- (R-T) EEC, SLEC, MPEC and DPEC Ctrl CRISPR and *Taz* CRISPR KO OT-I CD8<sup>+</sup> CD45.2<sup>+</sup> donor cells 65 days after primary infection (R), 2 days (S) and 4 days (T) after secondary infection analyzed according to KLRG1 and CD127 surface expression shown as mean  $\pm$  SEM bars. Dots represent individual mice (n=6/group).
- (U) Bacterial burden shown as CFU per  $\mu$ g of liver isolated from mice adoptively transferred with Ctrl CRISPR and *Taz* CRISPR KO OT-I cells 4 days post LmOVA challenge. Each dot represents individual mice (n=6/group).
- (V) % of CD4<sup>+</sup> T cells in hPBMCs from healthy donors and Barth Syndrome patients. Dots are individual donors.
- (W) CD45RA<sup>+</sup> and CD45RO<sup>+</sup> expression in CD8<sup>+</sup> T cells from healthy donors and Barth Syndrome patients. Dots are individual donors.
- (X) CD8<sup>+</sup> T naïve (T<sub>N</sub>), T stem cell memory (T<sub>SCM</sub>), T effector (T<sub>E</sub>), T central memory (T<sub>CM</sub>), T effector memory (T<sub>EM</sub>), T transition memory (T<sub>TM</sub>) analyzed according to CD8, CD45RO, CD197, CD95, CD28 expression as indicated was analyzed by flow cytometry. Dots are individual donors.
- Statistical comparisons for two groups were calculated by unpaired two-tailed Student's t test or Anova test, where indicated, \*p < 0.05; \*\*p < 0.01; \*\*\*p < 0.001.
